# Supplementary material
Source: PubMed Central journal article supplement (PMC8396108)
Supplement: NIHMS1687733-supplement-1.pdf [file NIHMS1687733-supplement-1.pdf]

## Supplementary materials

### 1. Methods

**1.1. Resveratrol (R) loaded nanoparticle formulae Optimization.** To optimize the formulae of nanoparticles, total soy PC weight was considered as 7 mg and the ratio of other compounds, including  $\alpha$ TA, Kolliphor® HS15, and R, were compared to PC, to determine the optimal composition for reaching high levels of physical stability, encapsulation efficiency, loading capacity and  $\Delta$ DCN cells binding affinity *in vitro* and *in vivo*. DSPE-PEG<sub>5000</sub> and DSPE-PEG<sub>5000</sub>-peptide were used to replace 5 mol% of PC to synthesize Rnano and L-Rnano. Characteristics, encapsulation efficiency, physical stability and binding efficiency of nanoparticles were determined as main manuscript described.

**1.2. Nanoparticles physical stability.** To determine the stability of nanoparticles at different temperatures, freshly prepared Rnano and L-Rnano were aliquoted into black tubes and stored at 4°C, 22°C, and 37°C for 3 days. The particle size and PI were measured using a Brookhaven BI-MAS particle size analyzer, and the zeta potential was measured using a Zeta PALS analyzer every 24 hours.

**1.3. *In vivo* fluorescence intensity.** The mice were sacrificed to separate the BAT, I-WAT, G-WAT, RP-WAT and liver for *ex vivo* imaging to determine the biodistribution pattern of DiD-loaded Rnano and L-Rnano using an IVIS *in vivo* imaging system. Then, the DiD intensity was analyzed using the NIH image J software.

**1.4. ASC targeting specificity of nanoparticles in RP-WAT.** After IVIS imaging, RP-WAT was enzymatically digested and SVF was collected, washed, lysed, counted and resuspended in flow buffer at  $1 \times 10^7$  cells/mL. SVF cells were stained with fluorophore-conjugated antibodies and analyzed using the Attune NxT flow cytometer as main manuscript described.

**1.5. Measure the weight of RP-WAT and I-BAT.** After sacrifice, brain, liver, lung, spleen, kidneys, skeletal muscle, BAT, RP-WAT, I-WAT and G-WAT of each mouse were collected, and weighed.

**1.6. Tissue weight of G-WAT and I-WAT.** After sacrifice, G-WAT and I-WAT were collected, weighed and imaged.

**1.7. I-WAT and G-WAT mRNA expression.** Total RNA was extracted from I-WAT and G-WAT using a TRIzol® reagent and cDNA was synthesized from quantified RNA using a Maxima First Strand cDNA Synthesis Kit according to the manufacturer's instructions. cDNA levels of target genes were measured using PowerUp SYBR™ green master mix on a real-time PCR system (Eppendorf Mastercycler® ep realplex instrument, NY). The mRNA-fold changes were calculated using the  $2^{-\Delta\Delta Ct}$  method, which were normalized against the

housekeeping gene 36B4. Primer sequences of target genes are listed in **Table S3**.

**1.8. Measurement of plasma inflammatory cytokines.** Plasma concentrations of cytokines and chemokine (TNF- $\alpha$ , MCP-1, IL-6, IFN- $\gamma$ ) were measured using the bead-based LEGENDplex™ mouse inflammation panel kit and analyzed on the Attune NxT flow cytometer. The data were analyzed using the LEGENDplex™ analysis software.

**1.9. Safety evaluation.** Five mice from each group were randomly selected for safety evaluation as main manuscript described.

## 2. Results

### 2.1. Optimization of nanoparticle formulae

The particle size, PI, encapsulation efficiency, physical stability, binding affinity to  $\Delta$ DCN cells and nanoparticle target and accumulation in WAT in C57BL/6J mice were used to optimize and screen nanoparticle formulae.

First, in order to increase R's encapsulation efficiency in nanoparticles, we fixed the PC weight and proportionally increased the weight of  $\alpha$ TA, Kolliphor® HS15, and R to synthesize Rnano (**Table S1**). As the R loading amount increased, R precipitated out of Rnano and accumulated at the bottom of the tube after storing them at 37°C for 24 hours. Therefore, the optimal weight ratios of PC: R were 7:4 and 7:5, which do not have R precipitation.

Second, to further optimize the formulae, Rnano stability and R's encapsulation efficiency were measured. As the weight of  $\alpha$ TA and Kolliphor® HS15 was increased, R's encapsulation efficiency increased, while the mean diameters of Rnano decreased. The physical stability of Rnano prepared using different formulae were compared (**Fig. S1A**). As the weight ratios of  $\alpha$ TA and Kolliphor® HS15 to PC increased, the physical stability of Rnano increased. For example, when comparing low  $\alpha$ TA and Kolliphor® HS15 content (PC:  $\alpha$ TA: Kolliphor® HS15: R = 7:20:20:4, weight ratio) to high  $\alpha$ TA and Kolliphor® HS15 content (PC:  $\alpha$ TA: Kolliphor® HS15: R = 7:22:22:4, weight ratio), the mean diameters of Rnano increased 20 nm or less than 5 nm over 5 days at 37°C at low and high  $\alpha$ TA and Kolliphor® HS15 content, respectively. Hence, high  $\alpha$ TA and Kolliphor® HS15 content formulae were chosen.

After selecting the range of ratios of PC:  $\alpha$ TA: Kolliphor® HS15: R from 7:22:22:4 to 7:34:34:5, the binding affinity of Rhoda-labeled L-Rnano to  $\Delta$ DCN cells was further used to optimize formulae. As the ratios of PC to  $\alpha$ TA and Kolliphor® HS15 were changed from 7:32:32 to 7:34:34 with the same R loading amount, the binding affinity to and uptake of Rhoda-L-Rnano by  $\Delta$ DCN cells were decreased (**Fig. S1B**). Therefore, two formulae finalists (PC:  $\alpha$ TA: Kolliphor® HS15: R = 7:22:22:4 and 7:32:32:5) were selected for a final testing in C57BL/6J mice.

Finally, WAT accumulation of DiD-labeled L-Rnano in C57BL/6J mice were used to select the final formula. After 24 hours of post-injection of DiD-labeled Rnano and L-Rnano, mice and the isolated BAT, RP-WAT, GWAT, I-WAT, and liver were visualized using the IVIS system. The higher DiD fluorescence intensity (blue color) indicated more nanoparticle accumulation. Under both finalist formulae, L-Rnano compared to Rnano had a higher accumulation in WAT *in situ* (**Fig. S1C**), and in isolated I-WAT and G-WAT, and lower accumulation in the liver (**Fig. S1D**). In addition, DiD-labeled L-Rnano made of formula 7:22:22:4 compared to 7:32:32:5 had much higher fluorescence signals in WAT, especially

I-WAT. Therefore, we chose PC:  $\alpha$ TA: Kolliphor® HS15: R = 7:22:22:4 as the final formula for both Rnano and L-Rnano in this study.

**Table S1.** Nanoparticle characteristics

| <b>PC: <math>\alpha</math>TA:<br/>Kolliphor®<br/>HS15: R (mg)</b> | <b>Particle<br/>size<br/>(nm)</b> | <b>PI</b>       | <b>Encapsulatio<br/>n efficiency<br/>(%)</b> | <b>Comments</b>                                                                    |
|-------------------------------------------------------------------|-----------------------------------|-----------------|----------------------------------------------|------------------------------------------------------------------------------------|
| <b>7:15:15:4</b>                                                  | 109.6 $\pm$ 0.3                   | 0.18 $\pm$ 0.15 | 85.2                                         | Low<br>encapsulation<br>efficiency                                                 |
| <b>7:20:20:4</b>                                                  | 102.6 $\pm$ 0.2                   | 0.21 $\pm$ 0.14 | 89.4                                         |                                                                                    |
| <b>7:22:22:4</b>                                                  | 92.0 $\pm$ 0.3                    | 0.17 $\pm$ 0.01 | 92.0                                         | High<br>encapsulation<br>efficiency                                                |
| <b>7:24:24:4</b>                                                  | 85.3 $\pm$ 0.2                    | 0.18 $\pm$ 0.01 | 96.6                                         |                                                                                    |
| <b>7:30:30:5</b>                                                  | 102.5 $\pm$ 0.2                   | 0.16 $\pm$ 0.04 | 95.3                                         | No R<br>precipitation<br>after storing<br>nanoparticles at<br>37°C for 24<br>hours |
| <b>7:32:32:5</b>                                                  | 92.1 $\pm$ 0.3                    | 0.18 $\pm$ 0.12 | 96.1                                         |                                                                                    |
| <b>7:34:34:5</b>                                                  | 85.3 $\pm$ 0.2                    | 0.17 $\pm$ 0.11 | 97.4                                         |                                                                                    |
| <b>7:34:34:6</b>                                                  | 96.0 $\pm$ 0.3                    | 0.17 $\pm$ 0.15 | 86.9                                         |                                                                                    |
| <b>7:36:36:6</b>                                                  | 83.1 $\pm$ 0.1                    | 0.12 $\pm$ 0.01 | 96.0                                         | R precipitation<br>after storing<br>nanoparticles at<br>37°C for 24<br>hours       |
| <b>7:40:40:7</b>                                                  | 106.6 $\pm$ 0.2                   | 0.20 $\pm$ 0.02 | 95.2                                         |                                                                                    |
| <b>7:42:42:7</b>                                                  | 99.3 $\pm$ 0.2                    | 0.10 $\pm$ 0.02 | 96.5                                         |                                                                                    |
| <b>7:44:44:8</b>                                                  | 88.6 $\pm$ 0.2                    | 0.20 $\pm$ 0.15 | 90.4                                         |                                                                                    |
| <b>7:46:46:8</b>                                                  | 81.1 $\pm$ 0.3                    | 0.20 $\pm$ 0.20 | 93.8                                         |                                                                                    |

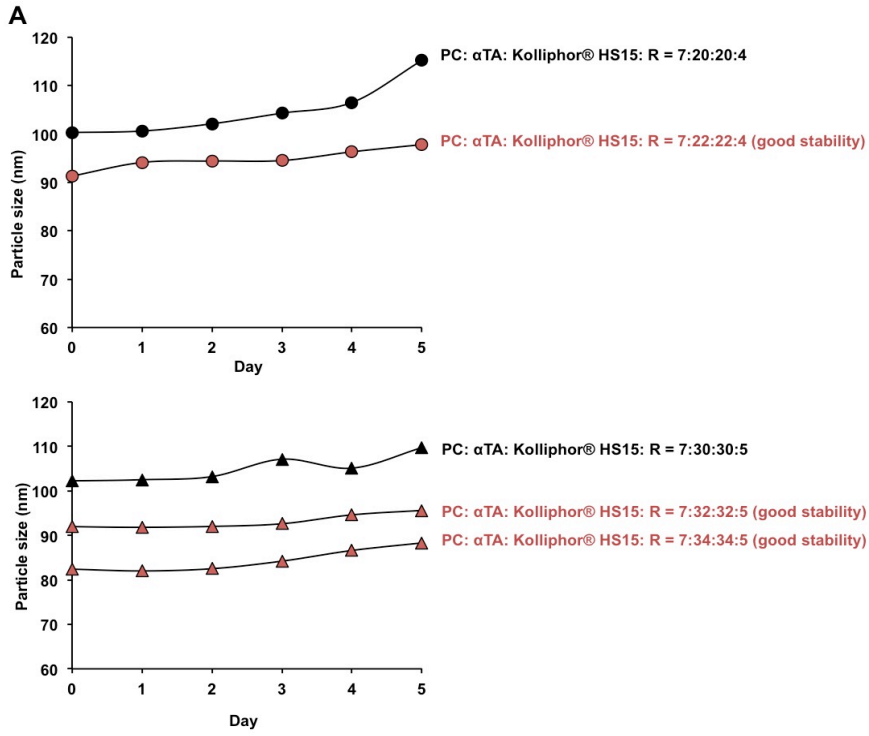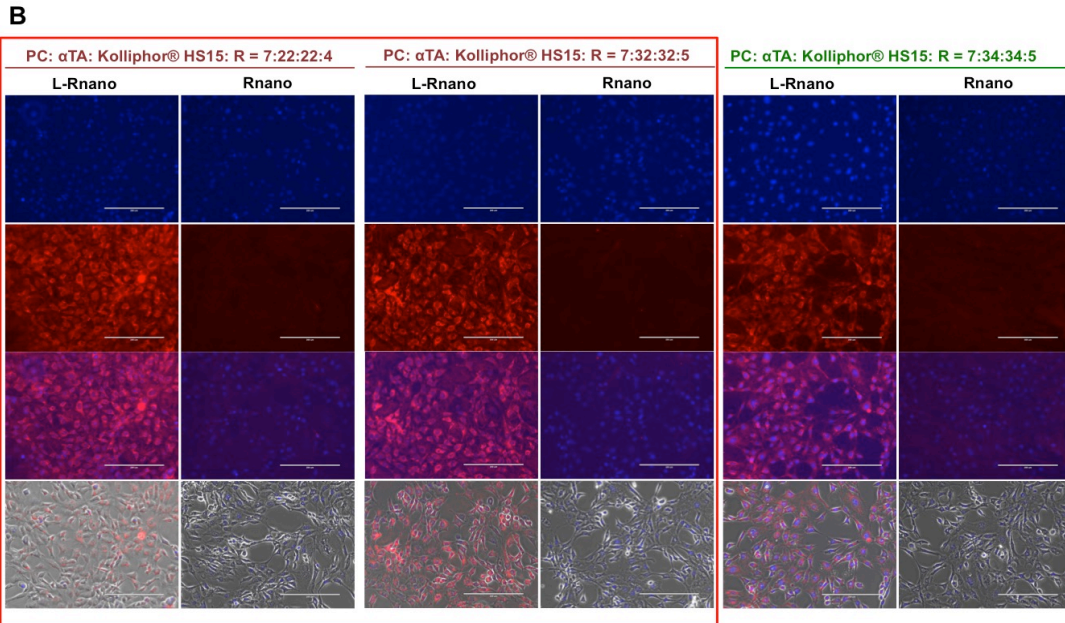

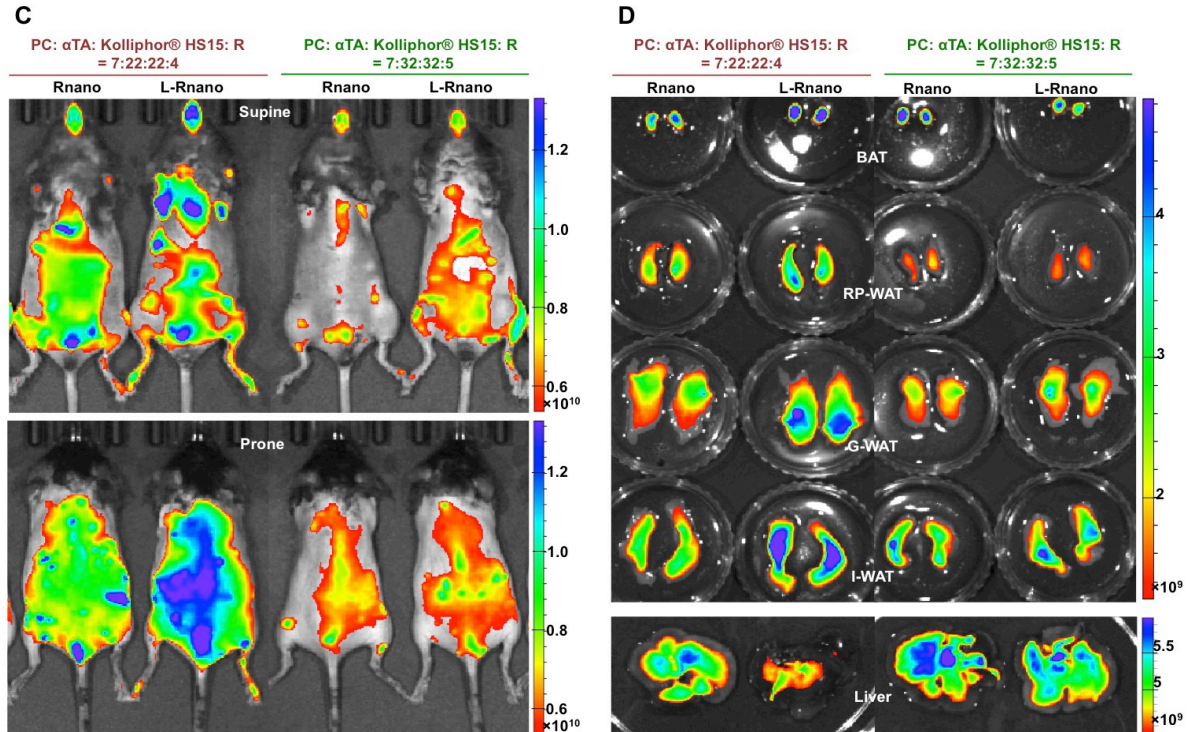

**Fig. S1.** Nanoparticle stability and binding affinity to  $\Delta$ DCN cells *in vitro*, and target specificity and biodistribution *in vivo* during optimization of nanoparticle formulae. **(A)** Formulation screening based on the size and stability of nanoparticles. Rnano were prepared using different formulae and incubated at 37°C for 5 days. Particle size was measured using a Brookhaven BI-MAS particle size analyzer. **(B)** Formulation screening based on L-Rnano binding to and uptake by  $\Delta$ DCN cells. Rhoda-labeled Rnano or L-Rnano (red) were prepared and incubated with  $\Delta$ DCN cells for 2 hours at 37°C. Cells were fixed, stained with DAPI (blue) and imaged by a fluorescence microscope. Images are representatives of three independent experiments. Scale bar = 200  $\mu$ m. **(C)** DiD-labeled Rnano or L-Rnano prepared using different formulae were injected intravenously into C57BL/6J mice. After 24 hours, DiD fluorescence was measured using the IVIS system on live mice. **(D)** DiD fluorescence was measured in isolated BAT, RP-WAT, GWAT, I-WAT, and liver. Radiance ( $\text{p/s/cm}^2/\text{sr}$ ) is shown. Images are representative of three independent experiments.

## 2.2. Physical stability of Rnano and L-Rnano

The physical stability of Rnano and L-Rnano with the final formula in 1×PBS, as indicated by their particle size, PI and zeta potentials, was measured for 3 days at 4°C, 22°C, and 37°C. After 3 days, the average particle size of both Rnano and L-Rnano was increased by 22% at 4°C (refrigerator temperature), 40% at 22°C (room temperature), and 50% at 37°C (body temperature) (**Fig. S2**). Increased particle size with higher temperature may be related to the breakage of hydrogen bonds of Kolliphor® HS15, leading to reduced stability of Rnano and L-Rnano. PI of Rnano and L-Rnano was increased 22% and 20%, respectively, regardless of storage temperatures, indicating increased heterogeneity. After storage at all tested temperatures for 3 days, the absolute zeta potential of Rnano and L-Rnano was decreased by 30% and increased by 40%, respectively.

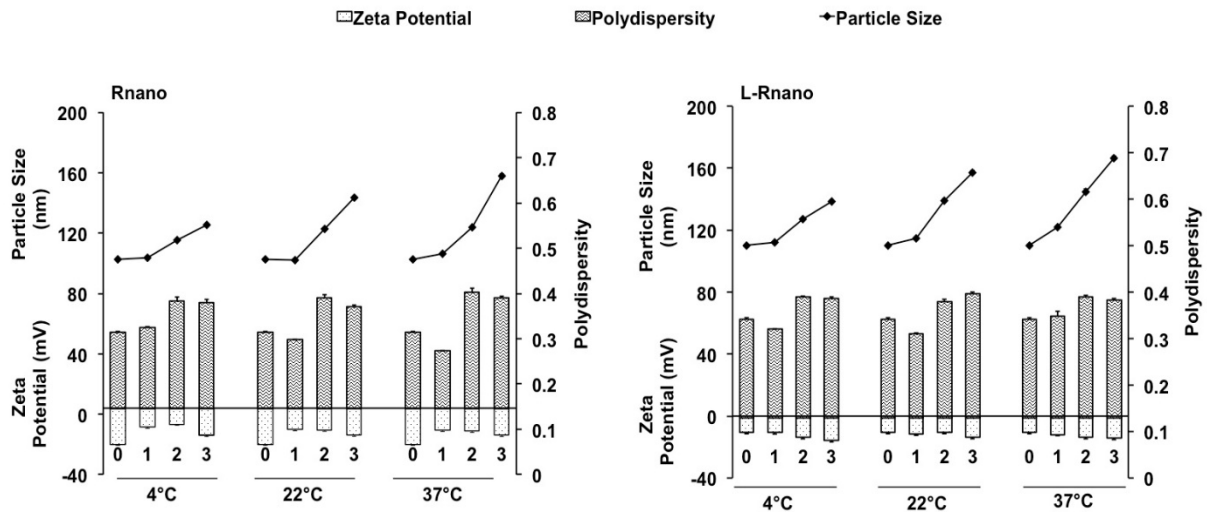

**Fig. S2.** Physical stability of Rnano and L-Rnano. Rnano and L-Rnano were incubated for 3 days at 4°C, 22°C, and 37°C. Changes in particle size, PI and zeta potential were measured by Brookhaven BI-MAS particle size and Zeta PALS analyzer.

### 2.3. DiD intensity of fat depots and the liver

After intravenous administration of DiD-labeled Rnano or L-Rnano to obese C57BL6J mice, the DiD intensity in different fat depots and liver were measured. Compared to Rnano, L-Rnano had 1.8-fold higher accumulation in I-WAT and 1.2-fold lower accumulation in the liver (Fig. S3). There were no significant differences in the fluorescence intensity in interscapular BAT (I-BAT) between Rnano and L-Rnano groups (Fig. S3).

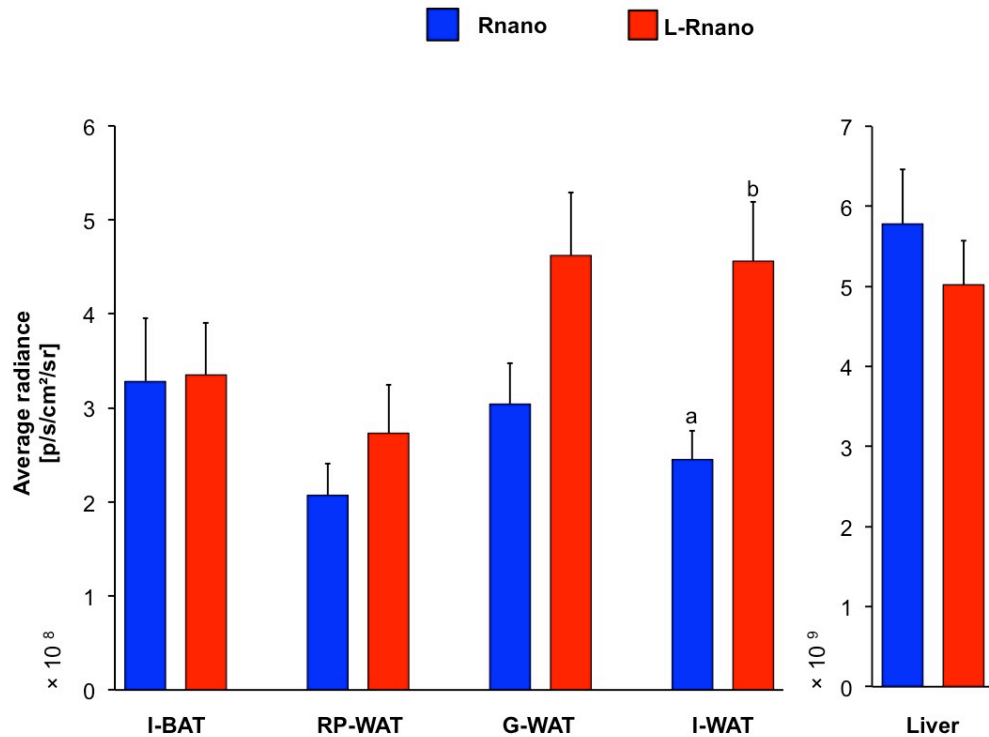

**Fig. S3.** Nanoparticle signals in the liver, BAT and different WAT depots of Rnano- and L-Rnano-treated mice. The IVIS data were quantitated for I-BAT, RP-WAT, G-WAT, I-WAT and liver isolated from DiD-labeled Rnano or L-Rnano-treated study mice. Data are expressed as mean  $\pm$  SEM. Bars without a common superscript differ,  $p < 0.05$ .



## 2.4. ASC target specificity of L-Rnano in RP-WAT.

After isolating SVF from RP-WAT, and identifying ASCs with antibodies, L-Rnano-treated mice had more “DiD+ ASCs” in RP-WAT (4.8-fold) than Rnano-treated mice, which were similar to the high “DiD+ ASCs” ratio in G-WAT and I-WAT of L-Rnano-treated mice (**Fig. S4**).

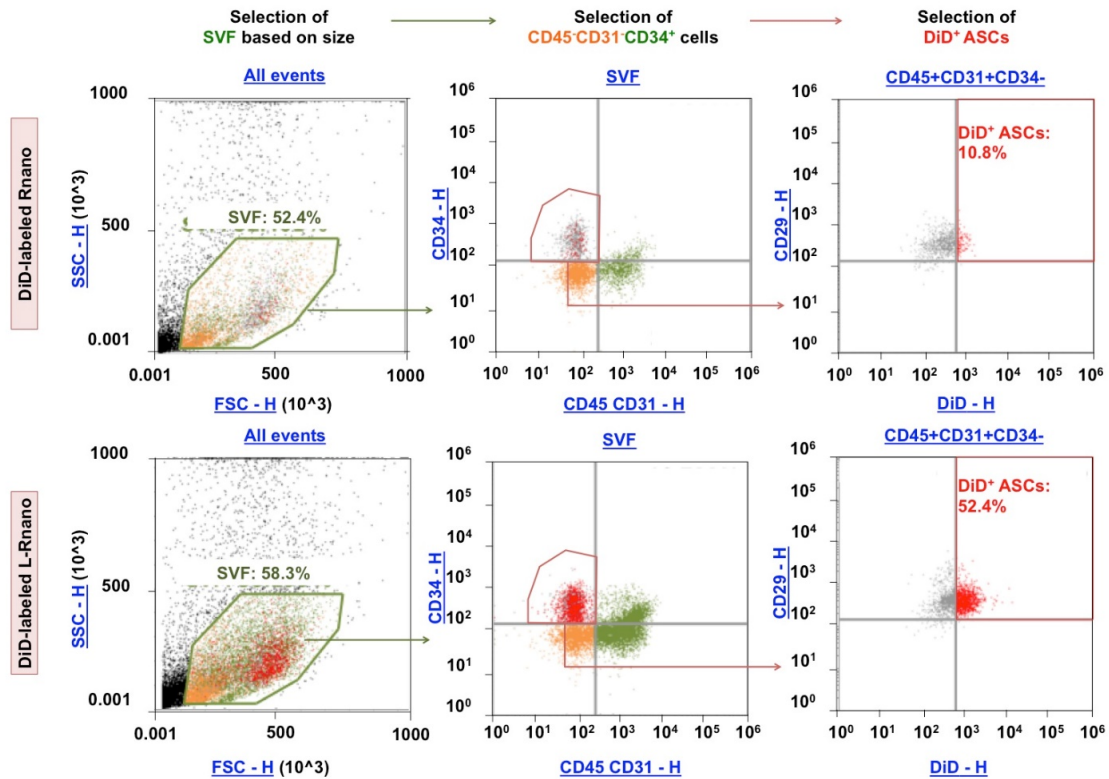

**Fig. S4.** ASC target specificity of L-Rnano in RP-WAT. After isolating SVF cells from RP-WAT from the study mice, the SVF cells were stained with antibodies, and ASCs were identified as CD45<sup>+</sup>/CD31<sup>+</sup>/CD34<sup>+</sup>/CD29<sup>+</sup> by flow cytometry. Binding and uptake of DiD-labeled Rnano or L-Rnano by ASCs in RP-WAT were measured by flow cytometry.

## 2.5. Weights of the RP-WAT and I-BAT

Compared to free R-treated mice, Rnano-treated and L-Rnano-treated mice had 1.71- and 2.22-fold ( $p < 0.05$ ) lower RP-WAT mass, and 1.16- and 1.24-fold ( $p < 0.05$ ) lower I-BAT mass, respectively (**Fig. S5**).

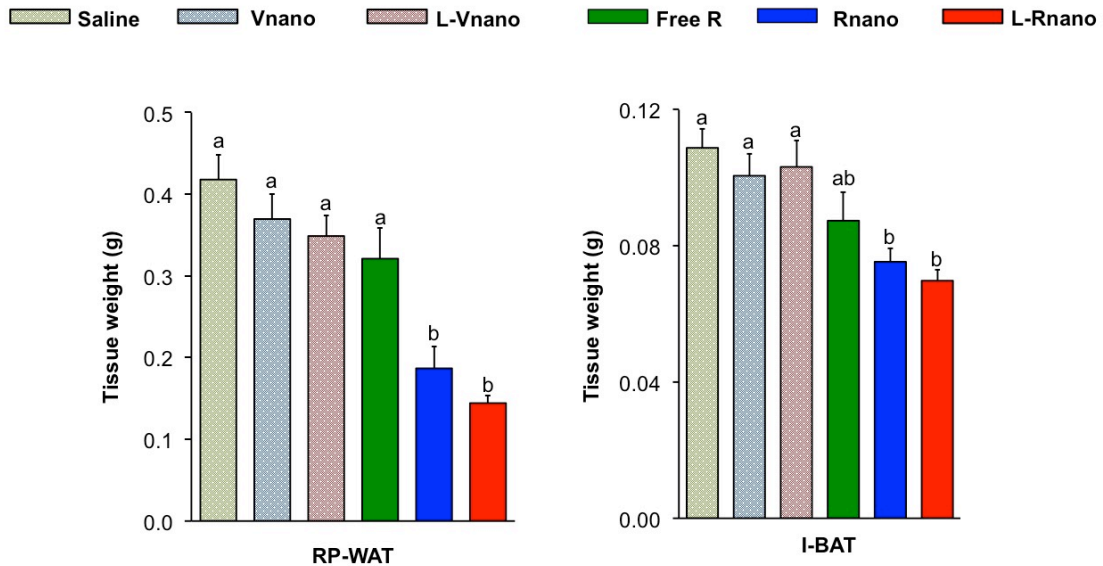

**Fig. S5.** RP-WAT and I-BAT masses. RP-WAT and I-BAT were isolated from the study mice and weighed by a microscale ( $n=10$ ). Data are expressed as mean  $\pm$  SEM. Bars without a common superscript differ,  $p < 0.05$ .

## 2.6. Representative images of G-WAT and I-WAT

The appearance of G-WAT and I-WAT excised from mice is shown in **Fig. S6**. L-Rnano-treated mice had the smallest G-WAT and I-WAT among 6 groups, which correlated with the lowest body weight and % body fat.

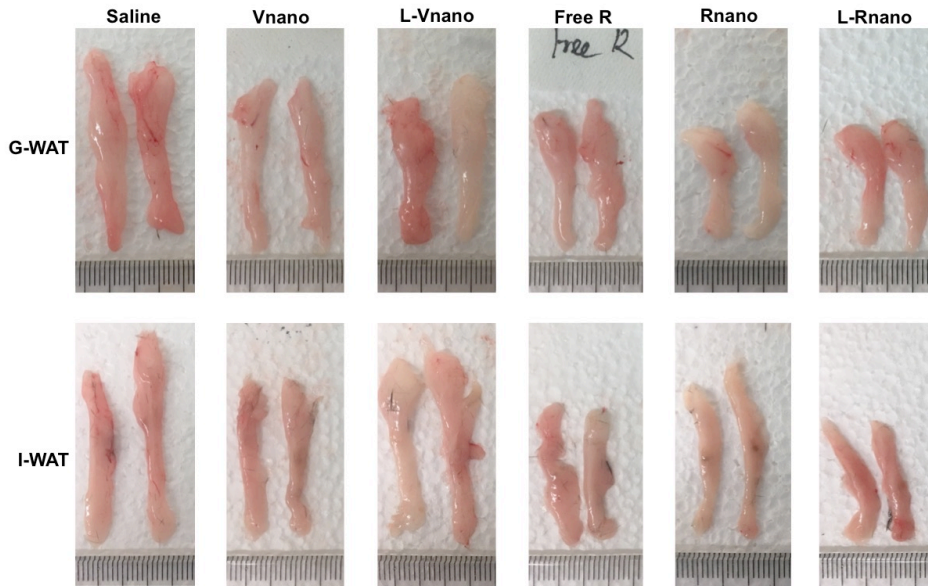

**Fig. S6.** Representative images of G-WAT and I-WAT. Comparison of the size of G-WAT and I-WAT excised from mice of each treatment.

## 2.7. I-WAT and G-WAT mRNA expression

The beige adipocyte selective marker CD137 mRNA levels in I-WAT of L-Rnano-treated mice were 2.65- and 1.56-fold ( $p < 0.05$ ) higher than that in mice treated with free R and Rnano, respectively (**Fig. S7A**). However, there were no significant differences in the mRNA levels of PGC-1 $\alpha$ , PRDM16, PPAR- $\gamma$ , and TMEM26 in I-WAT among all treatment groups (**Fig. S7A**). We also measured UCP-1 mRNA levels in G-WAT, UCP-1 mRNA levels in G-WAT isolated from Rnano-treated mice were 1.86- and 2.30-fold higher than that of the free R- and L-Rnano-treated mice, respectively (**Fig. S7B**).

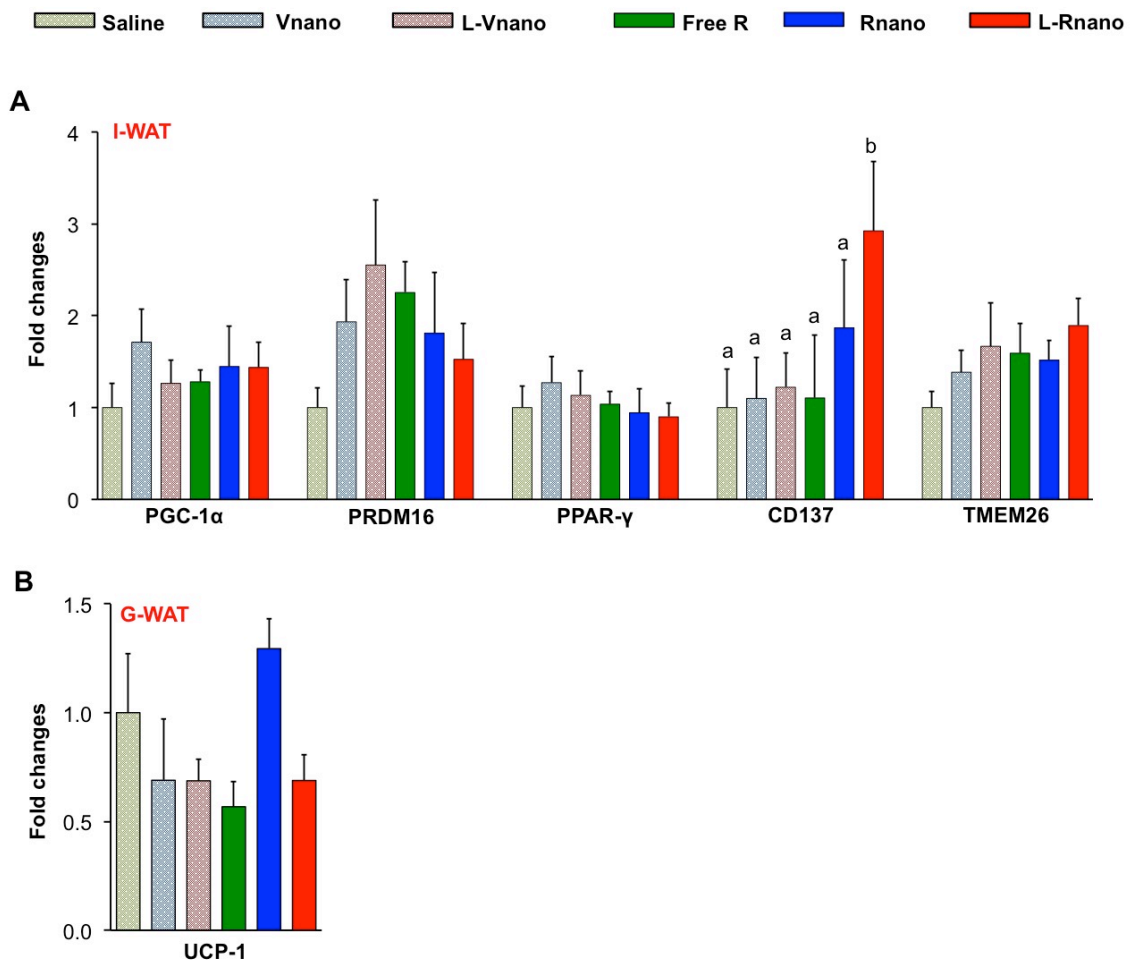

**Fig. S7.** Gene expression of browning markers in I-WAT and UCP-1 expression in G-WAT. **(A)** mRNA levels of PGC-1 $\alpha$ , PRDM16, PPAR- $\gamma$ , CD137 and TMEM26 in I-WAT were measured by real-time PCR ( $n=7$ ). **(B)** mRNA levels of UCP-1 in G-WAT were measured by real-time PCR ( $n=7$ ). Data are expressed as mean  $\pm$  SEM. Bars without a common superscript differ,  $p < 0.05$ .

## 2.8. Inflammatory cytokines expression

Plasma concentrations of inflammatory cytokines were measured in six treatment groups. Rnano-treated and L-Rnano-treated mice had the lowest plasma concentrations of TNF $\alpha$ , IL-6, IFN $\gamma$  and MCP-1 among all groups of mice (**Fig. S8A**). This suppression could be accompanied by decreasing macrophage infiltration in I-WAT. Therefore, we measured the expression of F4/80, the macrophage-specific marker, in I-WAT and found that L-Rnano-treated mice had 2-fold lower F4/80 mRNA levels than that of free R-treated mice (**Fig. S8B**).

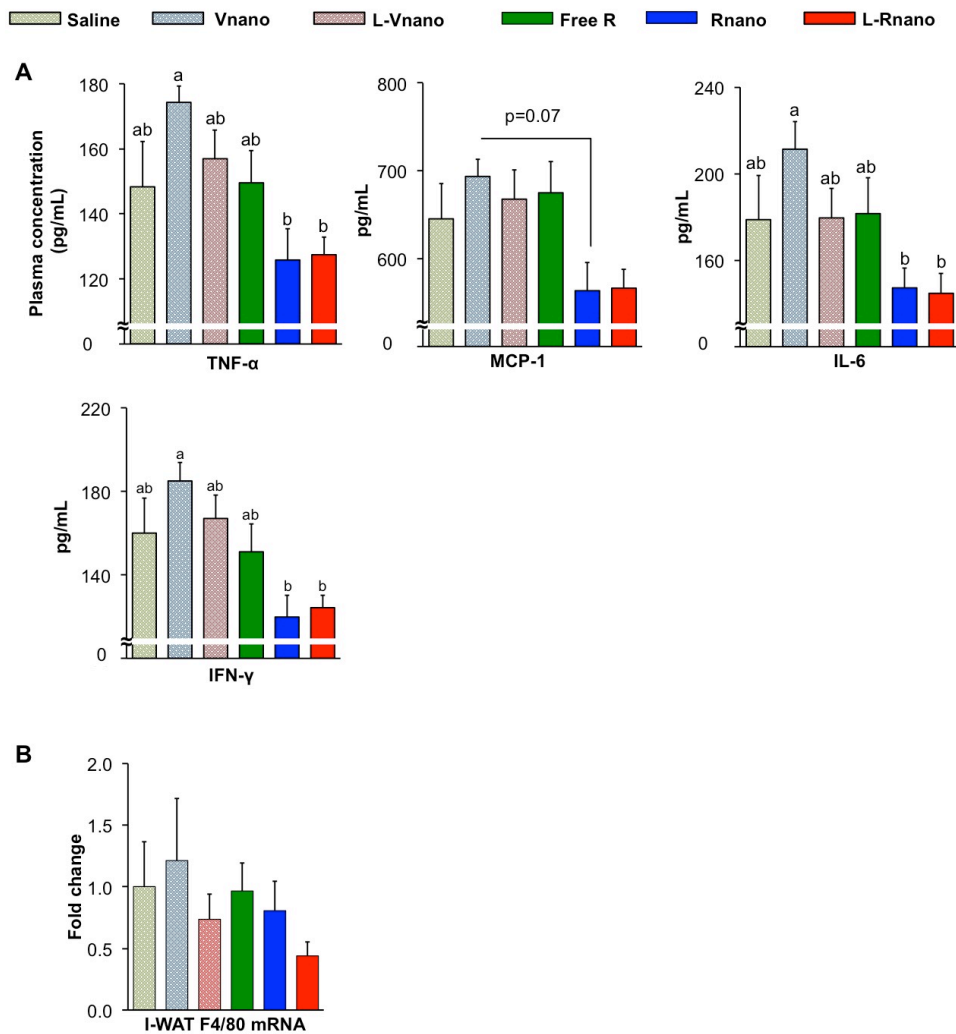

**Fig. S8.** Plasma concentrations of inflammatory factors and F4/80 gene expression in I-WAT. **(A)** Plasma concentrations of TNF- $\alpha$ , MCP-1, IL-6, and IFN- $\gamma$  were measured by a BioLegend® LEGENDplex™ inflammation kit (n=7). **(B)** mRNA levels of F4/80 in I-WAT were measured by real-time PCR (n=7). Data are expressed as mean  $\pm$  SEM. Bars without a common superscript differ,  $p < 0.05$ .



## 2.9. Safety evaluation

Histological examinations of the liver, heart, lung, kidneys, brain, spleen, and skeletal muscle of study mice have been conducted we evaluate the safety of Rnano and L-Rnano. And no significant differences between the saline and the other treatments have been observed (**Fig. S9**).

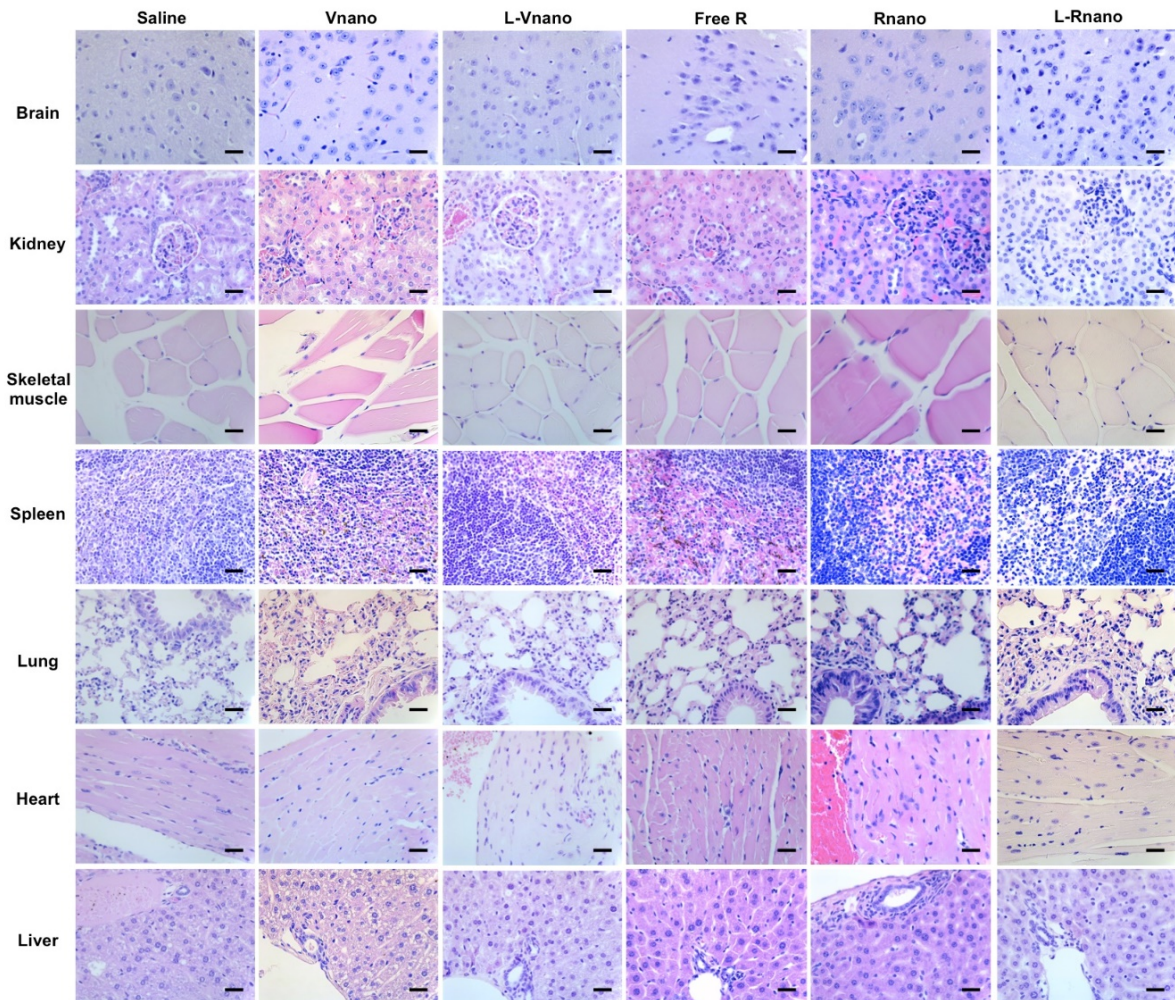

**Fig. S9.** Histological evaluation of tissues and organs. The representative H&E histological images of the heart, liver, lungs, kidneys, skeletal muscle, brain, and spleen from the study C57BL/6J mice, n=5. The tissue slides were fixed, embedded, sectioned, and stained for histological examination and evaluation, which were conducted by pathologists and scientists at Texas A&M Veterinary Medical Diagnostic Laboratory. Scale bar length is 50  $\mu$ m.

**Table S2.** Serum chemistry panel

|                                   | Saline      | Vnano         | L-<br>Vnano  | Free R       | Rnano        | L-<br>Rnano  |
|-----------------------------------|-------------|---------------|--------------|--------------|--------------|--------------|
| <b>Liver panel</b>                |             |               |              |              |              |              |
| Total Bilirubin (mg/dL)           | 0.2 ± 0.1   | 0.2 ± 0.1     | 0.2 ± 0.1    | 0.2 ± 0.1    | 0.1 ± 0.1    | 0.2 ± 0.1    |
| Aspartate amino transferase (U/L) | 72.3 ± 4.3  | 76.4 ± 21.1   | 81.0 ± 12.5  | 79.4 ± 7.2   | 101.0 ± 14.9 | 77.7 ± 24.2  |
| Alanine amino transferase (U/L)   | 23.3 ± 2.6  | 17.6 ± 2.1    | 19.0 ± 2.9   | 16.8 ± 0.7   | 20.8 ± 3.1   | 21.3 ± 5.8   |
| Alkaline phosphatase (U/L)        | 48.5 ± 3.5  | 26.4 ± 9.1    | 26.5 ± 8.3   | 43.0 ± 9.7   | 22.5 ± 6.0   | 33.5 ± 9.7   |
| Glutamate dehydrogenase (U/L)     | 20.0 ± 1.6  | 1.06 ± 2.2    | 22.8 ± 2.4   | 17.2 ± 1.0   | 22.7 ± 8.3   | 15.5 ± 2.5   |
| <b>Renal Panel</b>                |             |               |              |              |              |              |
| Total Serum Protein (g/dL)        | 5.25 ± 0.1  | 5.02 ± 0.2    | 5.03 ± 0.1   | 5.06 ± 0.1   | 4.8 ± 0.2    | 5.1 ± 0.2    |
| Albumin (g/dL)                    | 3.2 ± 0.1   | 3.1 ± 0.1     | 2.9 ± 0.1    | 2.9 ± 0.1    | 2.8 ± 0.1    | 2.8 ± 0.1    |
| Creatinine (mg/dL)                | 0.2         | 0.2           | 0.2          | 0.2          | 0.2          | 0.1          |
| Blood urea nitrogen (BUN) (mg/dL) | 25.8 ± 1.7  | 25.6 ± 1.0    | 26.3 ± 1.8   | 28.4 ± 0.9   | 28.0 ± 2.1   | 30.5 ± 1.7   |
| <b>Electrolytes</b>               |             |               |              |              |              |              |
| Sodium (mEq/L)                    | 150.7 ± 2.3 | 153.0 ± 3.3   | 151.0 ± 1.8  | 147.6 ± 3.2  | 149.5 ± 3.6  | 156.7 ± 4.0  |
| Potassium (mEq/L)                 | 9.0 ± 0.6   | 7.8 ± 0.2     | 8.2 ± 0.3    | 8.5 ± 0.4    | 7.5 ± 0.3    | 8.7 ± 0.4    |
| Na/K Ratio                        | 16.9 ± 1.0  | 19.4 ± 0.2    | 19.4 ± 1.0   | 19.4 ± 0.7   | 19.4 ± 0.4   | 19.4 ± 0.5   |
| Chloride (mEq/L)                  | 108.5 ± 1.9 | 103.0 ± 4.2   | 104.0 ± 2.1  | 105.6 ± 3.6  | 104.7 ± 2.8  | 114.2 ± 1.3  |
| Calcium (mg/dL)                   | 7.7 ± 1.4   | 6.2 ± 1.4     | 4.9 ± 0.9    | 6.7 ± 1.3    | 4.0 ± 0.0    | 7.6 ± 1.9    |
| <b>Others</b>                     |             |               |              |              |              |              |
| Albumin to globulin (A/G ratio)   | 1.6 ± 0.2   | 1.7 ± 0.1     | 1.4 ± 0.1    | 1.4 ± 0.1    | 1.3 ± 0.1    | 1.3 ± 0.1    |
| Globulins (g/dL)                  | 2.0 ± 0.1   | 1.9 ± 0.1     | 2.1 ± 0.1    | 2.2 ± 0.1    | 2.1 ± 0.1    | 2.2 ± 0.1    |
| Amylase (U/L)                     | 728.5 ± 7.8 | 997.4 ± 334.1 | 670.5 ± 52.0 | 723.0 ± 75.0 | 679.0 ± 85.6 | 571.0 ± 18.5 |

**Table S3.** Primer sequences

|                |         |                            |
|----------------|---------|----------------------------|
| 36B4           | Forward | GCTTCGTGTTACCAAGGAGGA      |
|                | Reverse | GTCCTAGACCAGTGTTCTGAGC     |
| UCP-1          | Forward | GCTTTGCCTCACTCAGGATTGG     |
|                | Reverse | CCAATGAACACTGCCACACCTC     |
| PPAR $\gamma$  | Forward | GTA CTGT CGGTTTCAGAAAGTGCC |
|                | Reverse | ATCTCCGCCAACAGCTTCTCCT     |
| PGC-1 $\alpha$ | Forward | GAATCAAGCCACTACAGACACCG    |
|                | Reverse | CATCCCTCTTGAGCCTTTCGTG     |
| PRDM16         | Forward | ATCCACAGCACGGTGAAGCCAT     |
|                | Reverse | ACATCTGCCACAGTCCTTGCA      |
| CD137          | Forward | CGTGCAGAACTCCTGTGATAAC     |
|                | Reverse | GTCCACCTATGCTGGAGAAGG      |
| Tmem26         | Forward | ACCCTGTCATCCCACAGAG        |
|                | Reverse | TGTTTGGTGGAGTCCTAAGGTC     |
| Leptin         | Forward | TGGGGTTTTGGAGCAGTTTG       |
|                | Reverse | CTGTCACTCTTCCCGGTCT        |
